# Supplementary material for: Earthworm-invaded boreal forest soils harbour distinct microbial communities
Source: Copernicus journal article supplement (doi:10.5194/egusphere-2022-1351), 2023-01-24
Supplement: Supplementary file [file egusphere-2022-1351-AC2-supplement.pdf]

Table A. Earthworm species found at each site after hand-sorting of the litter and hot mustard extraction for the mineral soil. Data from Lejoly et al. (2021).

| Site           | Species                                                               | Functional group |
|----------------|-----------------------------------------------------------------------|------------------|
| EMEND          | <i>Dendrobaena octaedra</i> Savigny                                   | Epigeic          |
| Valcartier     | <i>Dendrobaena octaedra</i> Savigny                                   | Epigeic          |
|                | <i>Aporrectodea turgida</i> Eisen                                     | Endogeic         |
|                | <i>Lumbricus rubellus</i> Hoffmeister                                 | Endogeic         |
|                | <i>Lumbricus</i> sp.                                                  | Anecic           |
| Grands Jardins | <i>Dendrodrilus rubidus</i> Savigny<br>(now <i>Bimastos rubidus</i> ) | Epigeic          |
|                | <i>Aporrectodea</i> spp.                                              | Endogeic         |
|                | <i>Octolasion tyrtaeum</i> Savigny                                    | Endogeic         |
|                | <i>Lumbricus terrestris</i> L.                                        | Anecic           |

Table B. Post-hoc pairwise comparisons of the permutational ANOVA (Table 1 of the manuscript). When the interaction between site and invasion was non-significant, the differences between sites are presented. When the interaction was significant (for ITS – MIN), the comparison between invaded and control samples is presented for each site separately. Grands Jardins (GJ) is a Podzol, Valcartier (VAL) a Brunisol, and EMEND a Luvisol.

|          |     | Pairs                     | SumofSq | F model | R <sup>2</sup> | p-value |
|----------|-----|---------------------------|---------|---------|----------------|---------|
| Fungi    | LFH | EMEND vs VAL              | 1.25    | 8.7     | 0.35           | <0.01   |
|          |     | EMEND vs GJ               | 0.95    | 6.1     | 0.33           | <0.01   |
|          |     | VAL vs GJ                 | 0.90    | 9.0     | 0.45           | <0.01   |
|          | MIN | EMEND: Control vs invaded | 0.23    | 1.8     | 0.16           | <0.01   |
|          |     | VAL: Control vs invaded   | 0.17    | 1.1     | 0.12           | 0.30    |
|          |     | GJ: Control vs invaded    | 0.27    | 1.5     | 0.27           | 0.10    |
| Bacteria | LFH | EMEND vs VAL              | 0.98    | 11.2    | 0.40           | <0.01   |
|          |     | EMEND vs GJ               | 1.40    | 21.8    | 0.61           | <0.01   |
|          |     | VAL vs GJ                 | 0.66    | 6.8     | 0.38           | <0.01   |
|          | MIN | EMEND vs VAL              | 0.87    | 12.3    | 0.38           | <0.01   |
|          |     | EMEND vs GJ               | 0.31    | 2.9     | 0.16           | <0.05   |
|          |     | VAL vs GJ                 | 0.36    | 4.2     | 0.23           | <0.01   |
| PLFA     | LFH | EMEND vs VAL              | 0.07    | 6.0     | 0.26           | <0.05   |
|          |     | EMEND vs GJ               | 0.14    | 38.2    | 0.76           | <0.01   |
|          |     | VAL vs GJ                 | 0.14    | 10.6    | 0.45           | <0.01   |
|          | MIN | EMEND vs VAL              | 0.09    | 15.5    | 0.45           | <0.01   |
|          |     | EMEND vs GJ               | 0.03    | 4.3     | 0.21           | <0.01   |
|          |     | VAL vs GJ                 | 0.04    | 7.5     | 0.33           | <0.01   |

Table C. Additional pairwise comparisons for the ITS – Mineral soils (where the interaction between site and invasion was significant).

| Pairs                  | SumofSq | F model | R <sup>2</sup> | p-value |
|------------------------|---------|---------|----------------|---------|
| EW-EMEND vs EW-VAL     | 0.87    | 6.4     | 0.33           | <0.01   |
| EW-EMEND vs CONT-EMEND | 0.23    | 1.8     | 0.16           | <0.01   |
| EW-EMEND vs EW-GJ      | 0.38    | 2.5     | 0.24           | <0.05   |
| EW-EMEND vs CONT-GJ    | 0.46    | 3.7     | 0.32           | <0.05   |
| EW-EMEND vs CONT-VAL   | 0.41    | 3.1     | 0.31           | <0.05   |
| EW-VAL vs CONT-EMEND   | 0.68    | 4.7     | 0.32           | <0.01   |
| EW-VAL vs EW-GJ        | 0.45    | 2.7     | 0.23           | <0.01   |
| EW-VAL vs CONT-GJ      | 0.54    | 3.8     | 0.30           | <0.01   |
| EW-VAL vs CONT-VAL     | 0.17    | 1.1     | 0.12           | 0.30    |
| CONT-EMEND vs EW-GJ    | 0.35    | 1.9     | 0.28           | <0.05   |
| CONT-EMEND vs CONT-GJ  | 0.39    | 2.9     | 0.37           | <0.05   |
| CONT-EMEND vs CONT-VAL | 0.35    | 2.3     | 0.37           | <0.10   |
| EW-GJ vs CONT-GJ       | 0.27    | 1.5     | 0.27           | 0.10    |
| EW-GJ vs CONT-VAL      | 0.30    | 1.4     | 0.32           | 0.20    |
| CONT-GJ vs CONT-VAL    | 0.28    | 1.9     | 0.39           | 0.10    |

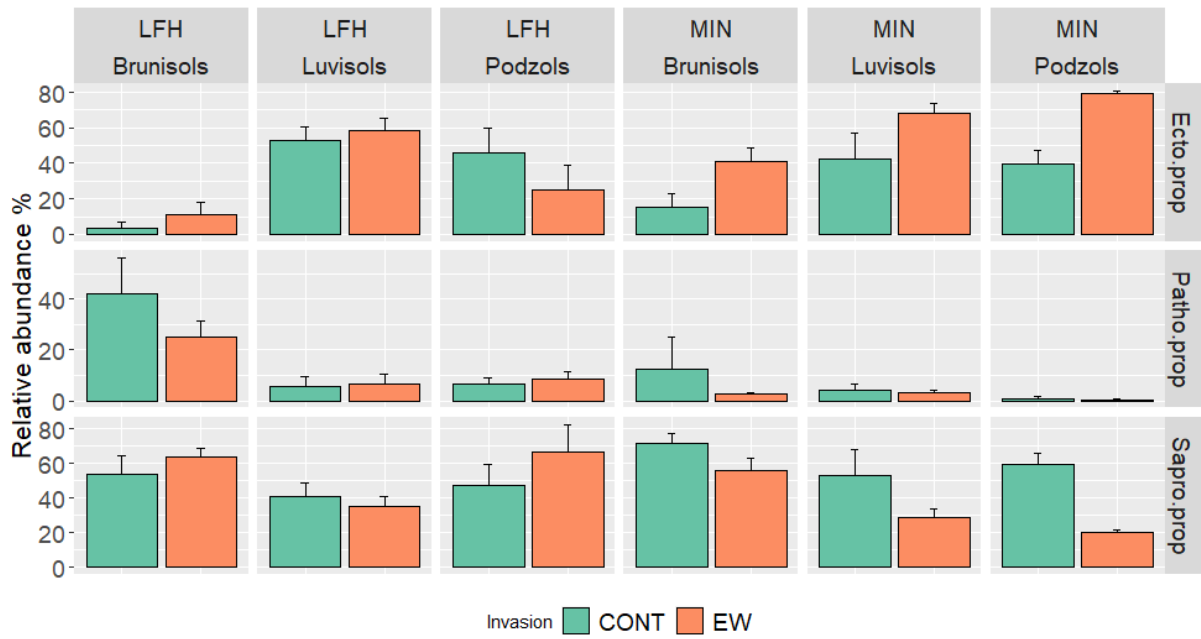

Figure A. Average ( $\pm 1$  SE) relative abundances (as number of reads) of fungal guilds per site. This corresponds to Figure 2 of the current manuscript.

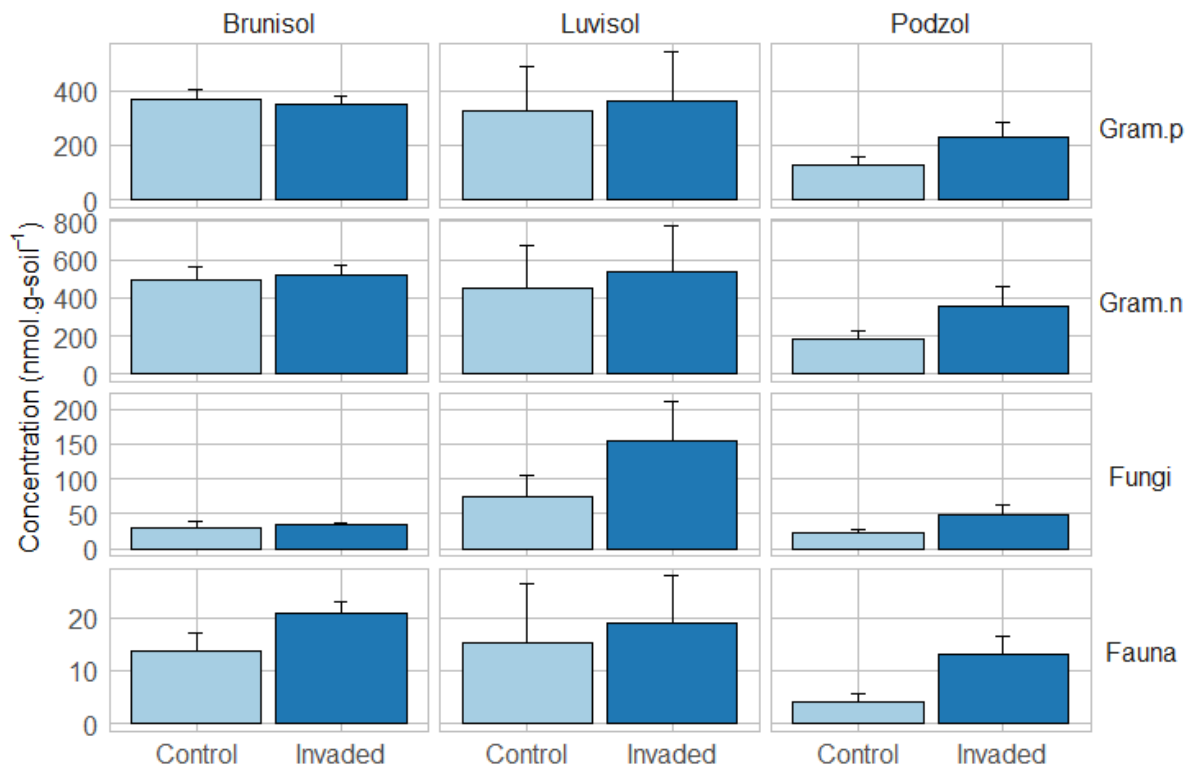

Figure B. Average ( $\pm 1$  SE) concentrations of PLFA groups per site/soil type. This corresponds to Figure 4 of the current manuscript.

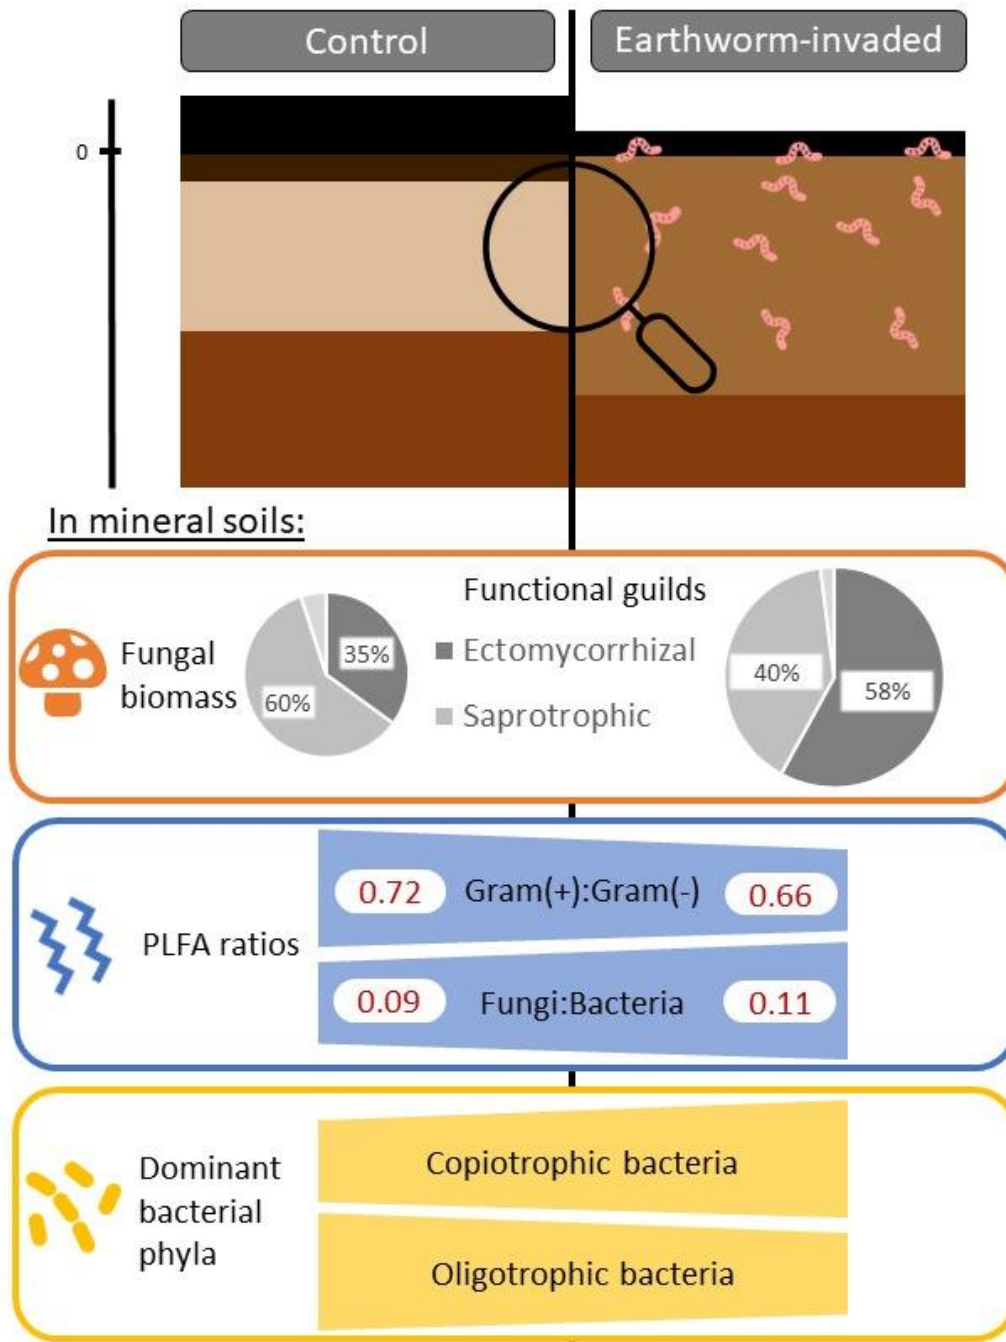

Figure C. Graphical abstract.
